# Supplementary material for: Facile synthesis of phycocyanin/polydopamine hierarchical nanocomposites for synergizing PTT/PDT against cancer
Source: Royal Society of Chemistry journal article supplement (doi:10.1039/d2ra05863d), 2022-01-01
Supplement: d2ra05863d1.pdf [file d2ra05863d1.pdf]

Supporting Information for

**Facile synthesis of phycocyanin/polydopamine hierarchical nanocomposites for synergizing PTT/PDT against cancer**

*Huazhen Liang, #<sup>a</sup> Yaling Sun, #<sup>b</sup> Chaoming Li,<sup>a</sup> Huaming Lin,<sup>a</sup> Qiwen Huang,<sup>\*c</sup> and Changguo Li<sup>\*a</sup>*

Dr. C. Li,

Department of Oncology, Maoming People's Hospital, Maoming, Guangdong, China

Email: [licgmm@163.com](mailto:licgmm@163.com)

Dr. Q. Huang,

Department of Pathology, Maoming People's Hospital, Maoming, Guangdong, China

Email: [huangqiwen163163@163.com](mailto:huangqiwen163163@163.com)

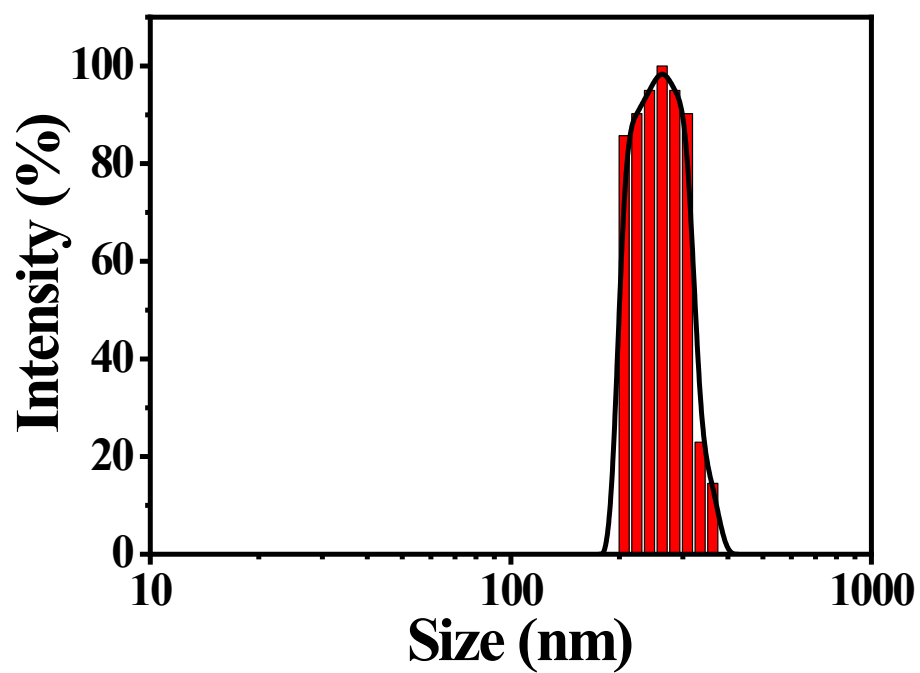

**Figure S1.** Size distribution (intensity) of MnPc@P NPs.

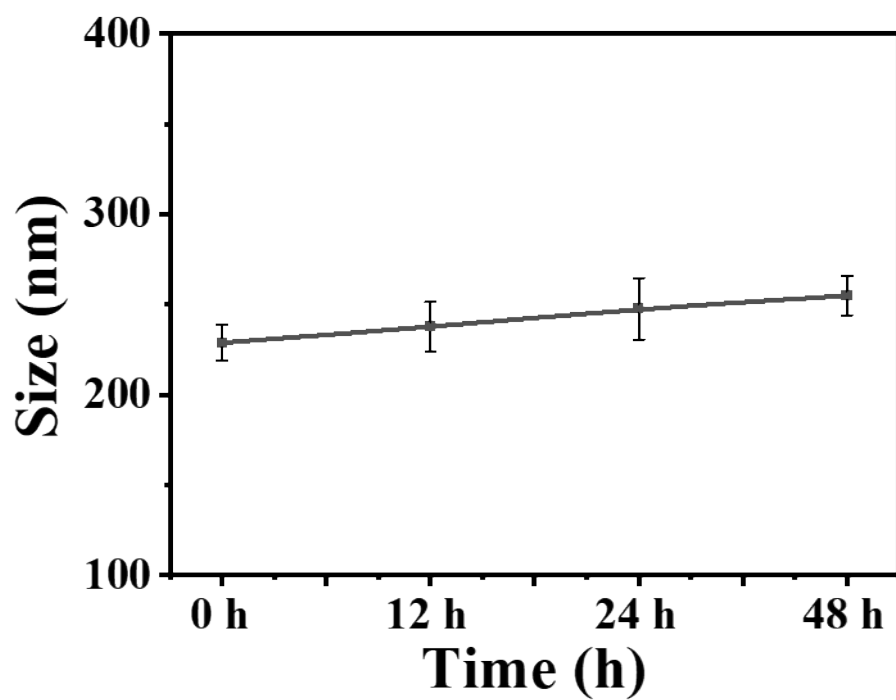

**Figure S2.** Hydrodynamic diameter changes of MnPc@P NPs dispersed in PBS at varied time points.

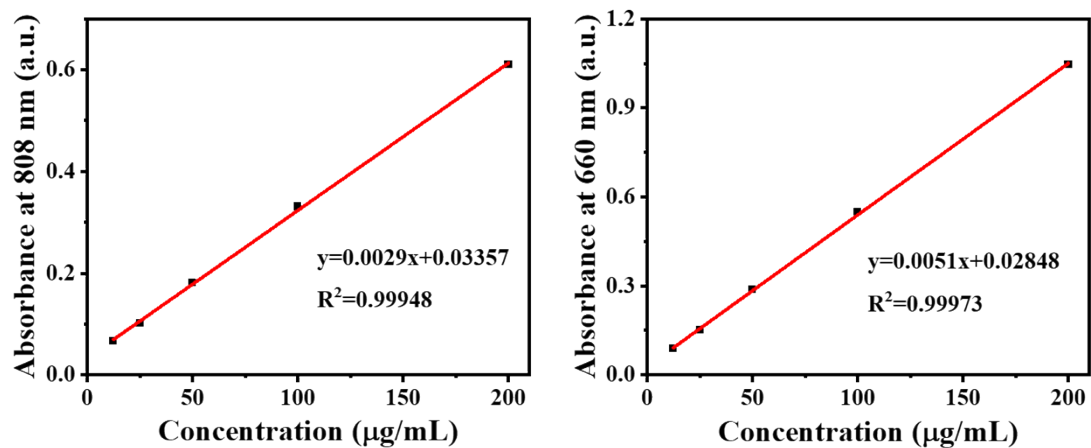

**Figure S3.** Linear relationship between concentration and absorbance of MnPc@P NPs at 808 and 660 nm.

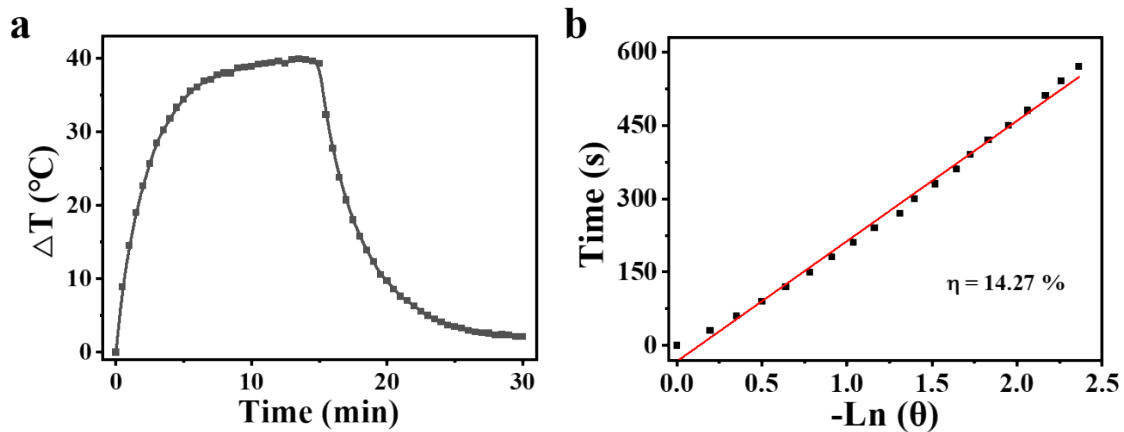

**Figure S4.** (a) Photothermal heating and cooling curves of MnPc@P NPs under 808 nm laser and (b) corresponding linear relationship between time and  $-\ln\theta$  from the cooling period.
